# Supplementary material for: Fluorescence spectroscopic characterisation of algal organic matter: towards improvedin situfluorometer development
Source: Royal Society of Chemistry journal article supplement (doi:10.1039/c8ew00731d), 2019-01-01
Supplement: c8ew00731d1.pdf [file c8ew00731d1.pdf]

## **Fluorescence spectroscopic characterisation of algal organic matter: towards improved in-situ fluorometer development**

Sara I. Khan <sup>1</sup>, Arash Zamyadi <sup>1, 2, 3</sup>, Narasinga Rao Hanumanth Rao <sup>1</sup>, Xiang Li<sup>1, 2</sup>, Richard M. Stuetz<sup>2</sup>, Rita K. Henderson <sup>1,\*</sup>

*1 The bioMASS Lab, School of Chemical Engineering, The University of New South Wales, Sydney, New South Wales, 2052, Australia*

*2 UNSW Water Research Centre, School of Civil and Environmental Engineering, The University of New South Wales, Sydney, New South Wales, 2052, Australia*

*3 Civil, Mineral and Mining Engineering Department, École Polytechnique de Montreal, Montreal, Canada*

*\*Corresponding author: [r.henderson@unsw.edu.au](mailto:r.henderson@unsw.edu.au)*

Table S1: Characteristics of bloom forming species

| <b>Characteristics</b>     | <b><i>Dolichospermum circinalis</i></b>          | <b><i>Cylindrospermopsis raciborskii</i></b>            | <b><i>Microcystis aeruginosa</i></b> |                               |                              |                              | <b><i>Chlorella vulgaris</i></b> |
|----------------------------|--------------------------------------------------|---------------------------------------------------------|--------------------------------------|-------------------------------|------------------------------|------------------------------|----------------------------------|
| <b>Strain</b>              | CS-533/02                                        | CS-508                                                  | CS-555                               | CS-554                        | CS-564                       | CS-566                       | CS-42/7                          |
| <b>Type</b>                | Cyanobacteria                                    | Cyanobacteria                                           | Cyanobacteria                        | Cyanobacteria                 | Cyanobacteria                | Cyanobacteria                | Algae                            |
| <b>Geometric shape</b>     | Filamentous                                      | Chained filaments (Trichomes)                           | Sphere                               | Sphere                        | Sphere                       | Sphere                       | Sphere                           |
| <b>Dimensions</b>          | L = 2-3 $\mu\text{m}$ ;<br>W = 2-3 $\mu\text{m}$ | L = 50-300 $\mu\text{m}$ ,<br>W = 1.7–4.2 $\mu\text{m}$ | D = 4-6 $\mu\text{m}$                | D = 4-6 $\mu\text{m}$         | D = 4-6 $\mu\text{m}$        | D = 4-6 $\mu\text{m}$        | D = 2-10 $\mu\text{m}$           |
| <b>Fluorescent pigment</b> | Phycocyanin<br>Chlorophyll-a                     | Phycocyanin<br>Chlorophyll-a                            | Phycocyanin<br>Chlorophyll-a         | Phycocyanin<br>Chlorophyll-a  | Phycocyanin<br>Chlorophyll-a | Phycocyanin<br>Chlorophyll-a | Chlorophyll-a                    |
| <b>Strain origin</b>       | Canning river,<br>Perth                          | Townsville, North<br>Queensland                         | Lake burley,<br>Griffin              | Irrigation<br>canal, Griffith | St Marys<br>STP, TAS         | Werribee,<br>STP, Victoria   | Unknown                          |
| <b>Toxicity</b>            | Below detection                                  | Non-toxic                                               | Toxic                                | below<br>detection            | below<br>detection           | Toxic                        | Non-toxic                        |

**Table S2: Comparisons between individual models versus the unified model**

| <b>Component</b> | <b>C 1</b> | <b>C 2</b> | <b>C 3</b> | <b>C 4</b> | <b>C 5</b> | <b>C 6</b> |
|------------------|------------|------------|------------|------------|------------|------------|
| <b>MA555</b>     | 0.99/0.99* | 0.97/0.98  | 0.97/0.99  |            | 0.97/0.95  | 0.99/0.97  |
| <b>MA564</b>     | 0.96/0.98  | 1.00/0.93  | 1.00/0.86  | 0.95/0.94  | 1.00/0.97  |            |
| <b>MA554</b>     | 1.00/0.99  |            | 0.95/0.94  | 0.91/0.72  | 1.00/0.52  | 0.90/0.70  |
| <b>MA566</b>     | 1.00/0.81  | 1.00/0.85  | 0.95/0.94  | 0.91/0.71  | 0.99/0.90  |            |
| <b>DC</b>        | 0.99/0.89  | 0.96/0.93  | 0.96/0.94  | 0.92/0.91  | 0.98/0.87  | 0.97/0.86  |
| <b>CV</b>        | 0.82/0.67  | 0.95/0.92  | 0.94/0.92  | 0.91/0.87  | 0.97/0.85  |            |
| <b>CR</b>        |            | 0.96/0.94  | 0.97/0.94  | 0.98/0.96  | 0.95/0.94  | 0.95/0.96  |

\* Correspondence is indicated by Tucker correlation coefficients for excitation/emission spectra

Table S3A: Statistical analysis for the AOM properties of algae and cyanobacterial species two-way ANOVA (*p* value analysis) with  $\alpha=0.01$

|                      | DOC           | DC           | CR           | CV           | MA555         | MA554        | MA564         | MA566        |
|----------------------|---------------|--------------|--------------|--------------|---------------|--------------|---------------|--------------|
| <b>C1</b>            | 0.156         | 0.42         | 0.14         | 0.39         | 0.23          | <b>0.002</b> | <b>0.007</b>  | <b>0.004</b> |
| <b>C2</b>            | <b>0.0002</b> | 0.02         | <b>0.004</b> | <b>0.01</b>  | <b>0.001</b>  | 0.35         | 0.21          | 0.74         |
| <b>C3</b>            | <b>0.0008</b> | 0.01         | <b>0.006</b> | <b>0.003</b> | <b>0.004</b>  | 0.69         | 0.35          | 0.65         |
| <b>C4</b>            | <b>0.001</b>  | 0.31         | 0.61         | 0.2          | 0.53          | <b>0.013</b> | <b>0.001</b>  | <b>0.001</b> |
| <b>C5</b>            | 0.120         | 0.26         | 0.26         | 0.19         | 0.31          | 0.45         | 0.34          | 0.48         |
| <b>C6</b>            | <b>0.004</b>  | 0.73         | 0.74         | 0.23         | 0.47          | 0.37         | 0.26          | 0.56         |
| <b>Normalised C1</b> | 0.120         | 0.21         | 0.11         | 0.16         | 0.19          | <b>0.006</b> | <b>0.003</b>  | <b>0.002</b> |
| <b>Normalised C2</b> | <b>0.004</b>  | <b>0.001</b> | <b>0.003</b> | <b>0.003</b> | <b>0.0006</b> | 0.54         | 0.19          | 0.39         |
| <b>Normalised C3</b> | <b>0.006</b>  | <b>0.004</b> | <b>0.002</b> | <b>0.002</b> | <b>0.002</b>  | 0.32         | 0.28          | 0.47         |
| <b>Normalised C4</b> | <b>0.005</b>  | 0.13         | 0.24         | 0.14         | 0.46          | <b>0.001</b> | <b>0.0007</b> | <b>0.003</b> |
| <b>Normalised C5</b> | 0.07          | 0.17         | 0.16         | 0.16         | 0.62          | 0.16         | 0.46          | 0.29         |
| <b>Normalised C6</b> | <b>0.002</b>  | 0.32         | 0.35         | 0.52         | 0.37          | 0.18         | 0.71          | 0.34         |
| <b>C1: (C2+C4)</b>   | 0.11          | -            | -            | -            | -             | -            | -             | -            |
| <b>C2:C4</b>         | 0.02          | -            | -            | -            | -             | -            | -             | -            |
| <b>C2:C1</b>         | <b>0.004</b>  | -            | -            | -            | -             | -            | -             | -            |
| <b>C3:C2</b>         | <b>0.004</b>  | -            | -            | -            | -             | -            | -             | -            |

Table S3B: Statistical analysis between PARAFAC component and LC-OCD fractions two-way ANOVA (*p* value analysis) with  $\alpha=0.01$

|                        | C1   | C2   | C3           | C4   | C5   | C6            |
|------------------------|------|------|--------------|------|------|---------------|
| <b>Biopolymers</b>     | 0.78 | 0.85 | <b>0.002</b> | 0.47 | 0.43 | <b>0.0006</b> |
| <b>Proteins</b>        | 0.63 | 0.36 | <b>0.003</b> | 0.24 | 0.51 | <b>0.003</b>  |
| <b>Polysaccharides</b> | 0.58 | 0.24 | 0.41         | 0.36 | 0.85 | 0.14          |
| <b>BBlocks</b>         | 0.64 | 0.16 | 0.94         | 0.79 | 0.76 | 0.16          |
| <b>LMW acids</b>       | 0.23 | 0.54 | 0.14         | 0.26 | 0.18 | <b>0.001</b>  |

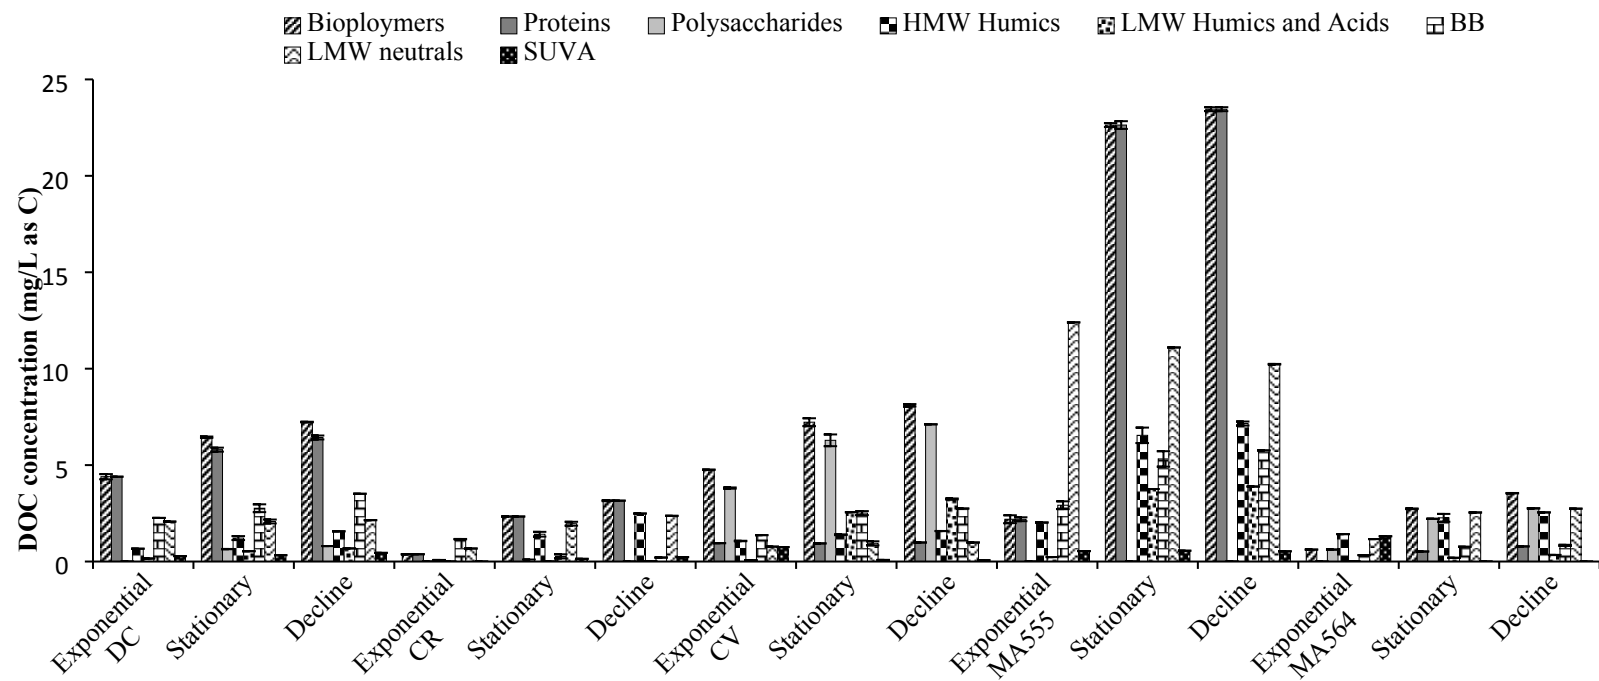

Figure S1: AOM composition of (i) DC (ii) CR (iii) CV (iv) MA555) and (v) MA564 at different growth phases

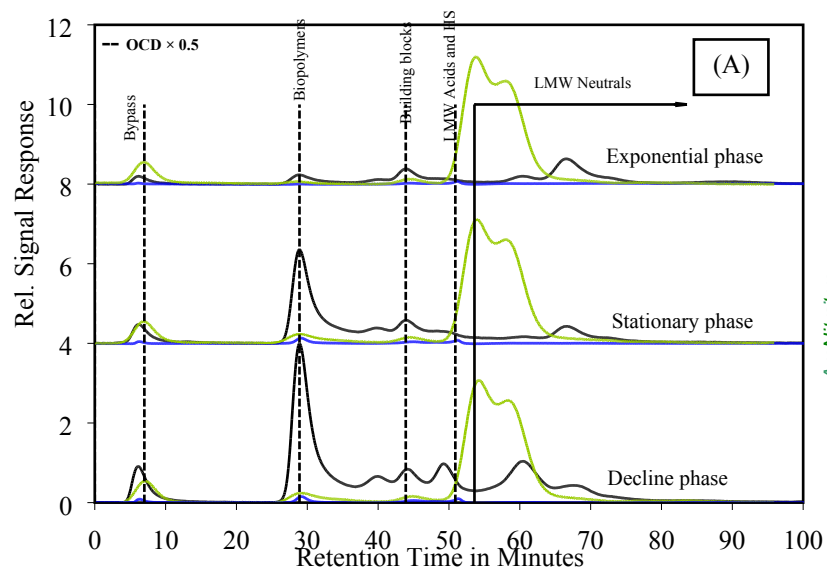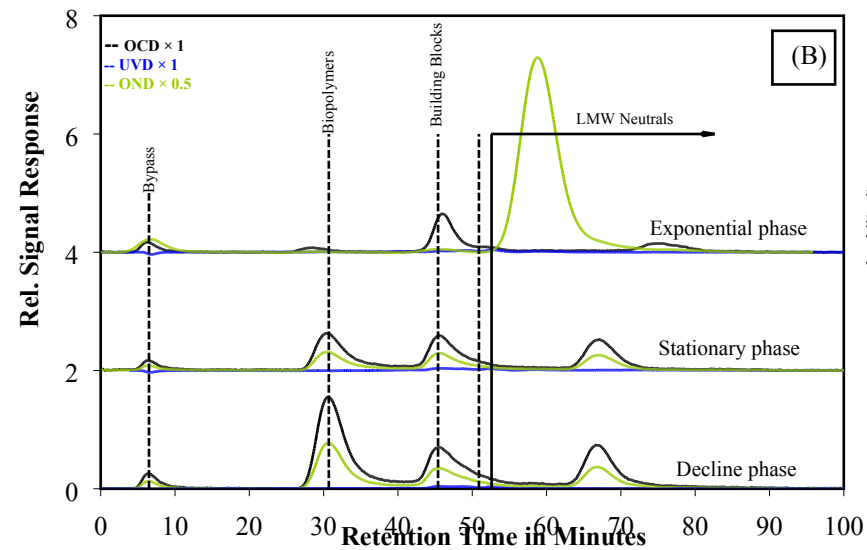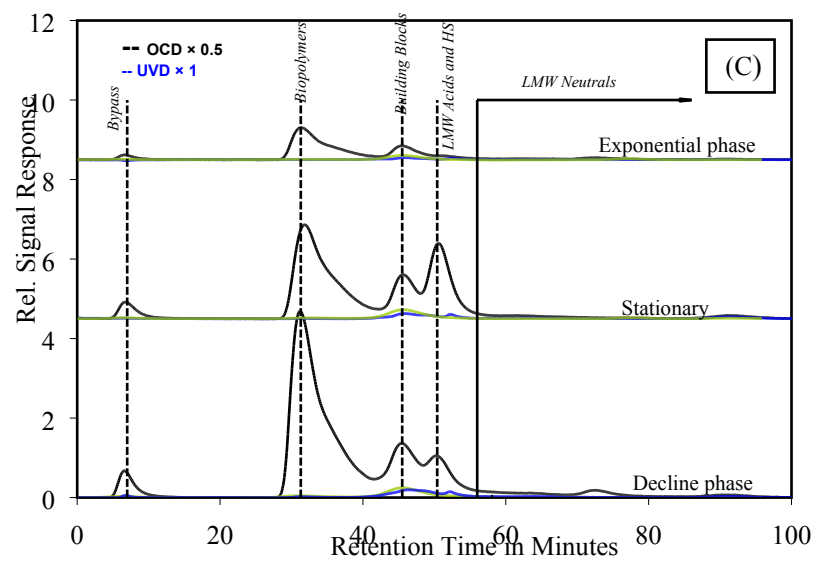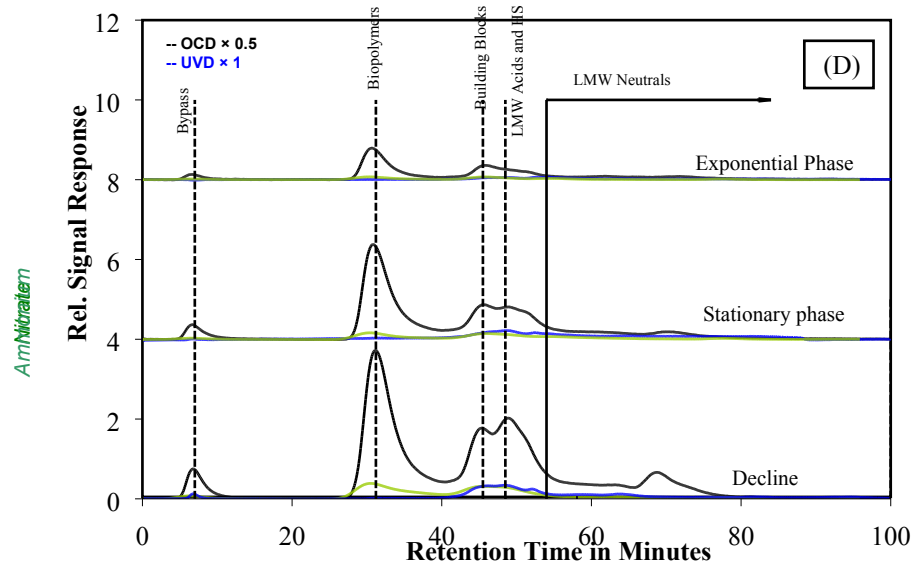

Figure S2: LC-OCD chromatograms of AOM from (A) MA555 (B) CR (C) CV and (D) DC at different growth phase

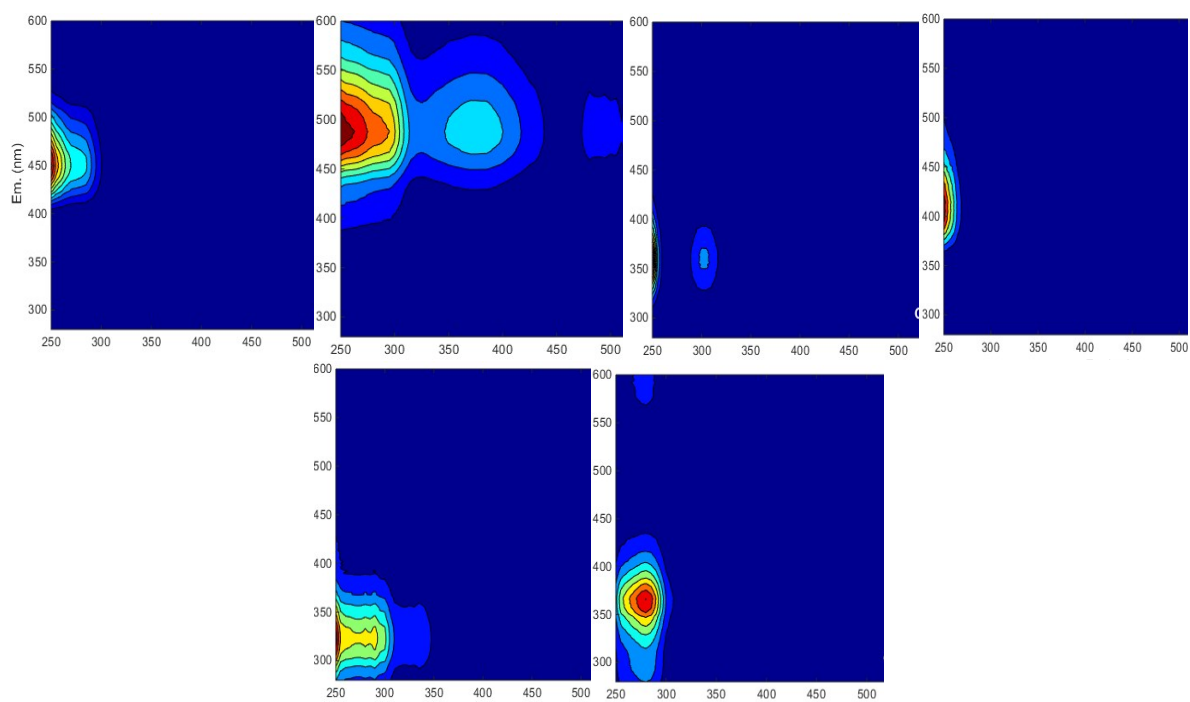

Figure S3: Contour plots of the six AOM components identified from the complete F-EEMs dataset

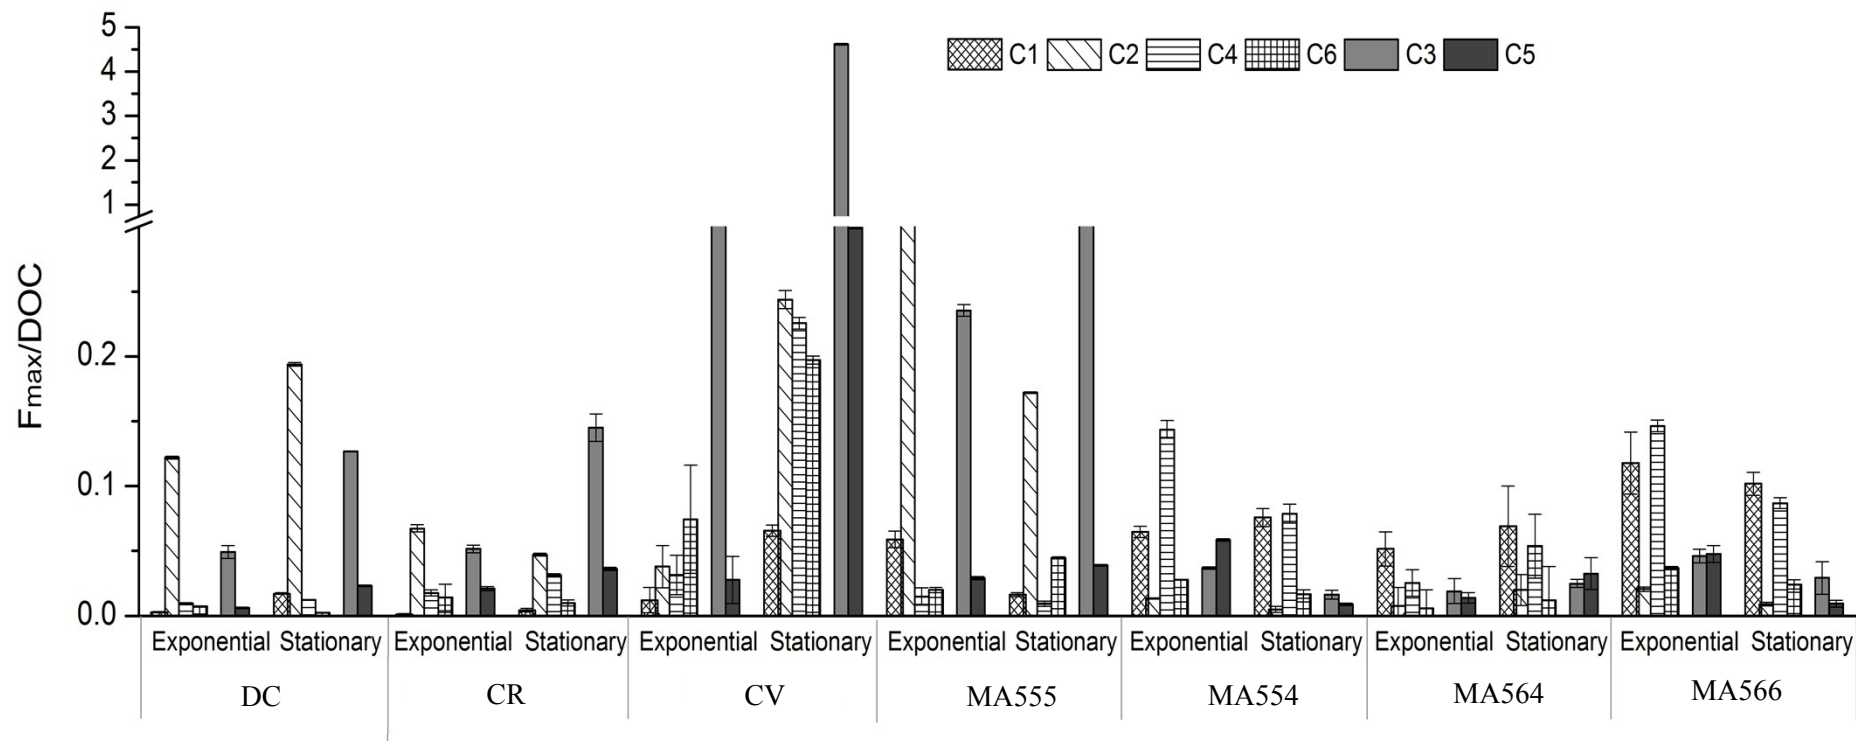

Figure S4: Normalized fluorescence intensity of observed AOM components along the growth phase of species



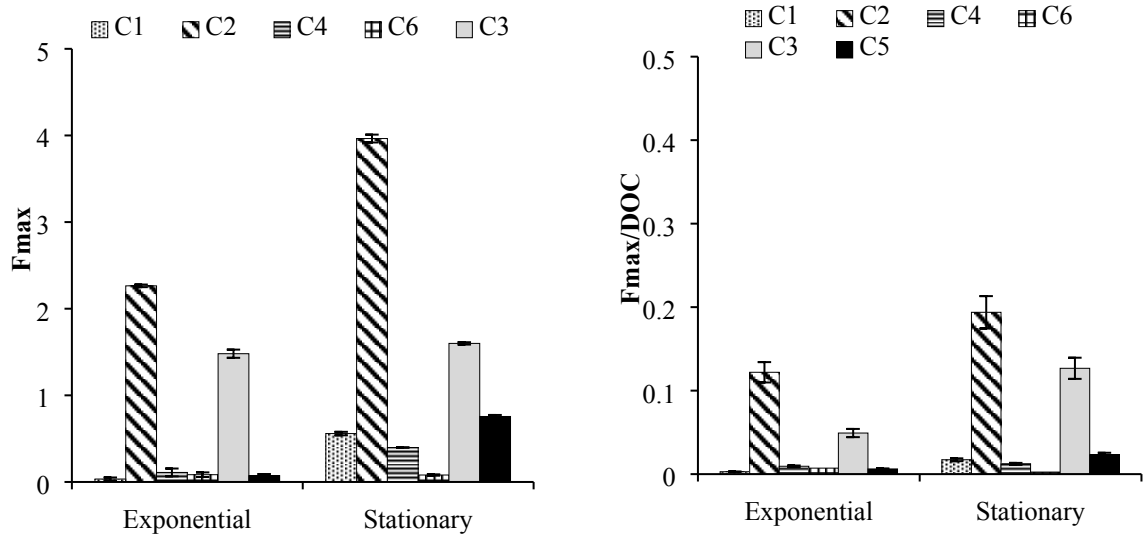

Figure S5:  $F_{max}$  and  $F_{max}/DOC$  for DC for observed AOM components

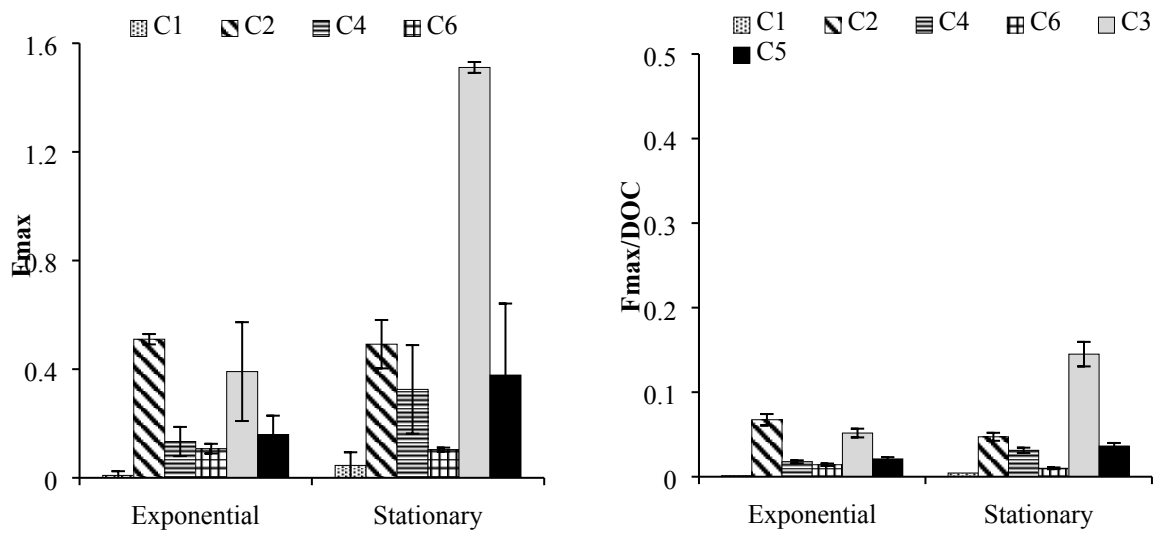

Figure S6:  $F_{max}$  and  $F_{max}/DOC$  for CR for observed AOM components

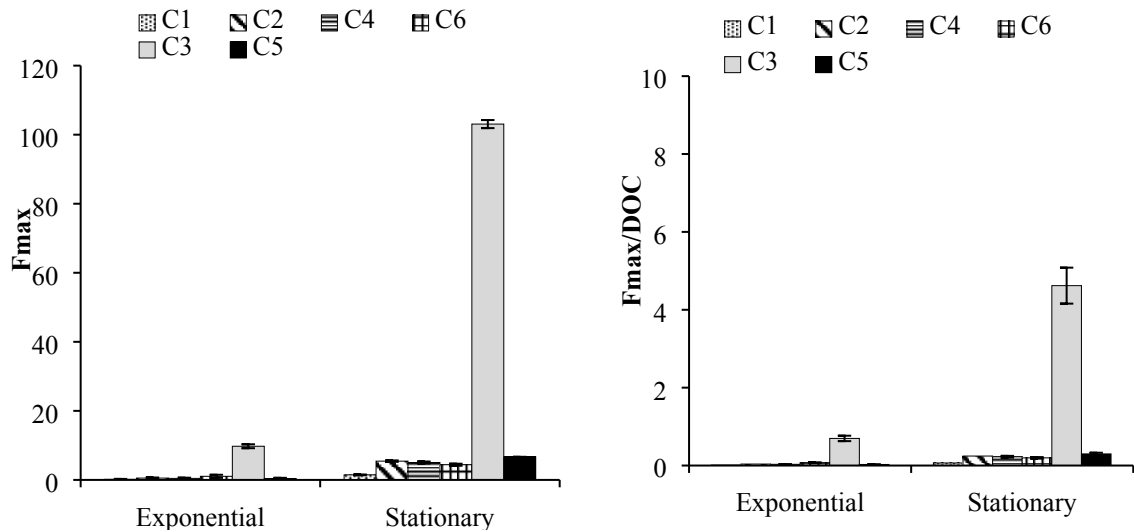

Figure S7:  $F_{max}$  and  $F_{max}/DOC$  for CV for observed AOM components

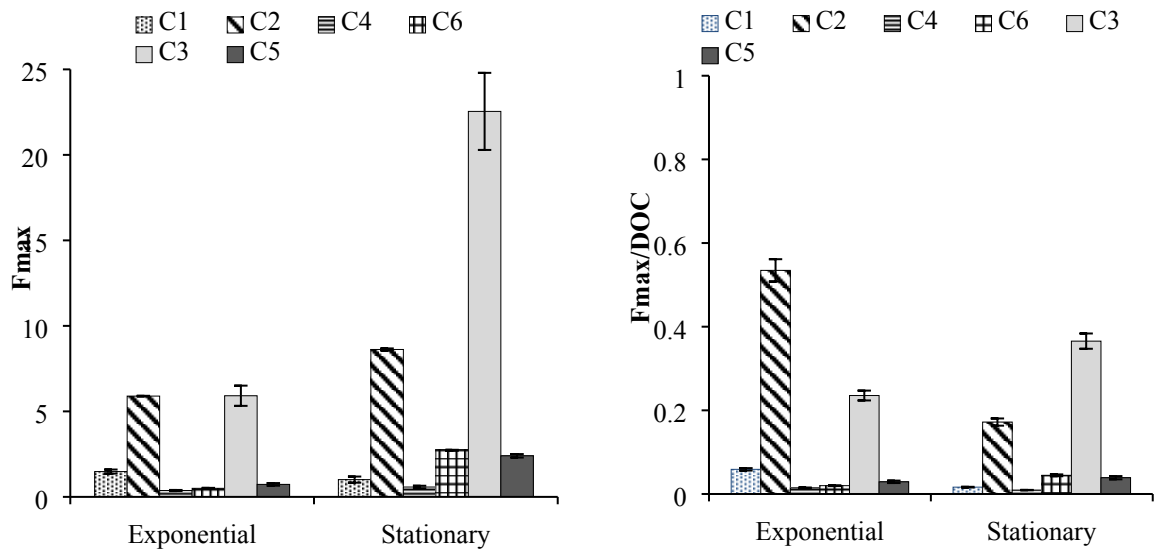

Figure S8:  $F_{max}$  and  $F_{max}/DOC$  for MA555 for observed AOM components

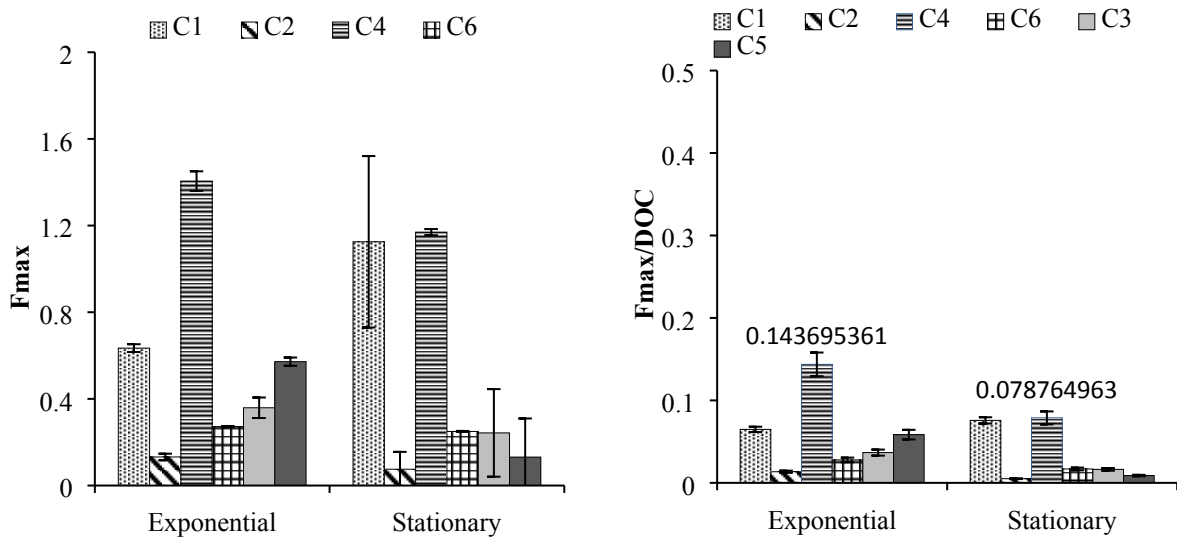

Figure S9:  $F_{max}$  and  $F_{max}/DOC$  for MA554 for observed AOM components

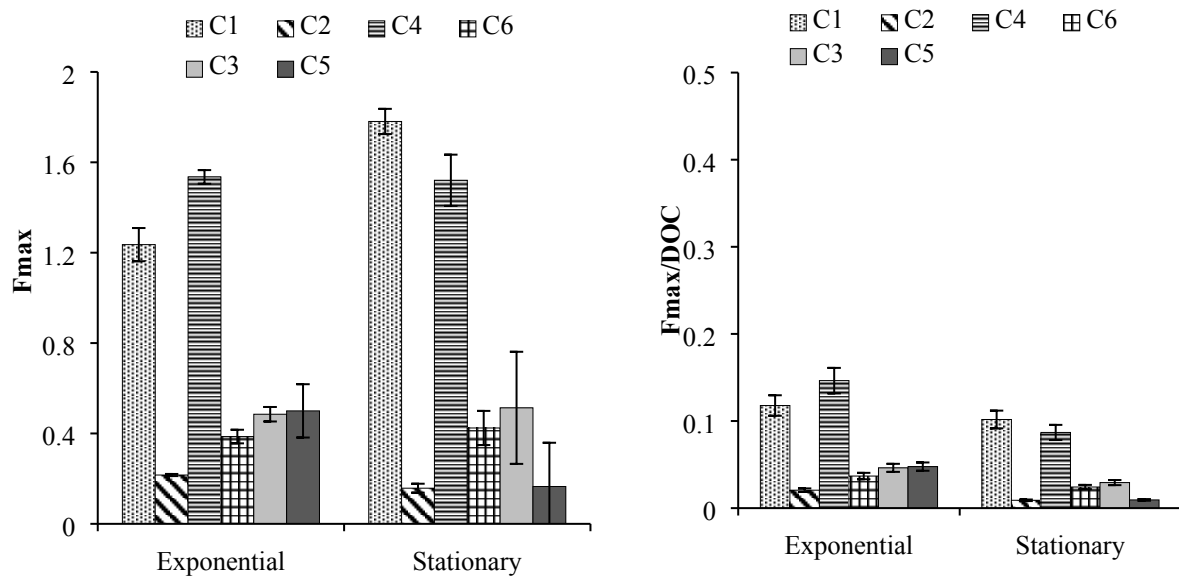

Figure S10:  $F_{max}$  and  $F_{max}/DOC$  for MA566 for observed AOM components

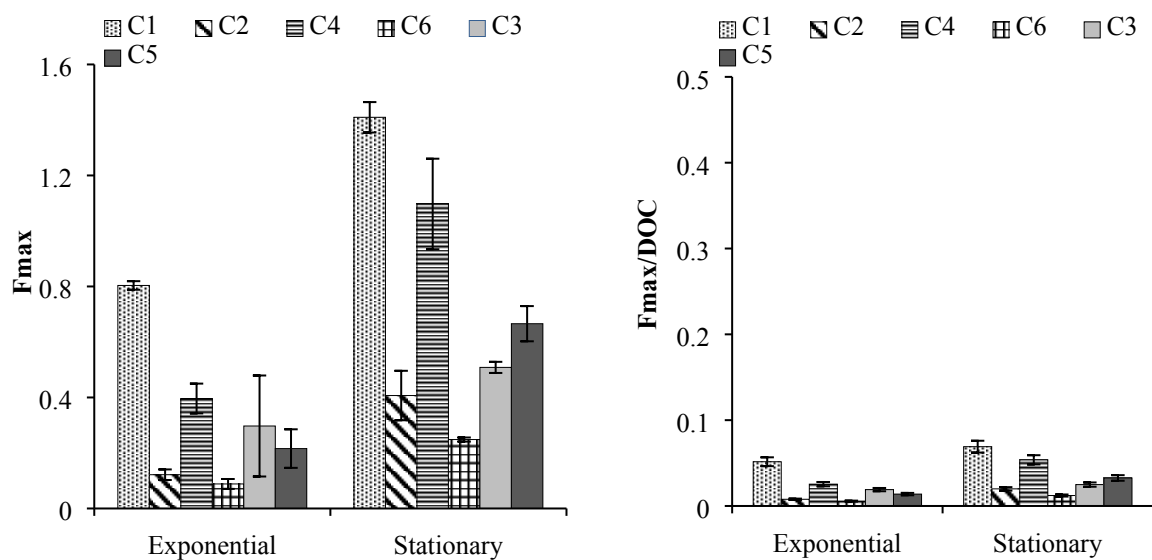

Figure S11:  $F_{max}$  and  $F_{max}/DOC$  for MA564 for observed AOM components

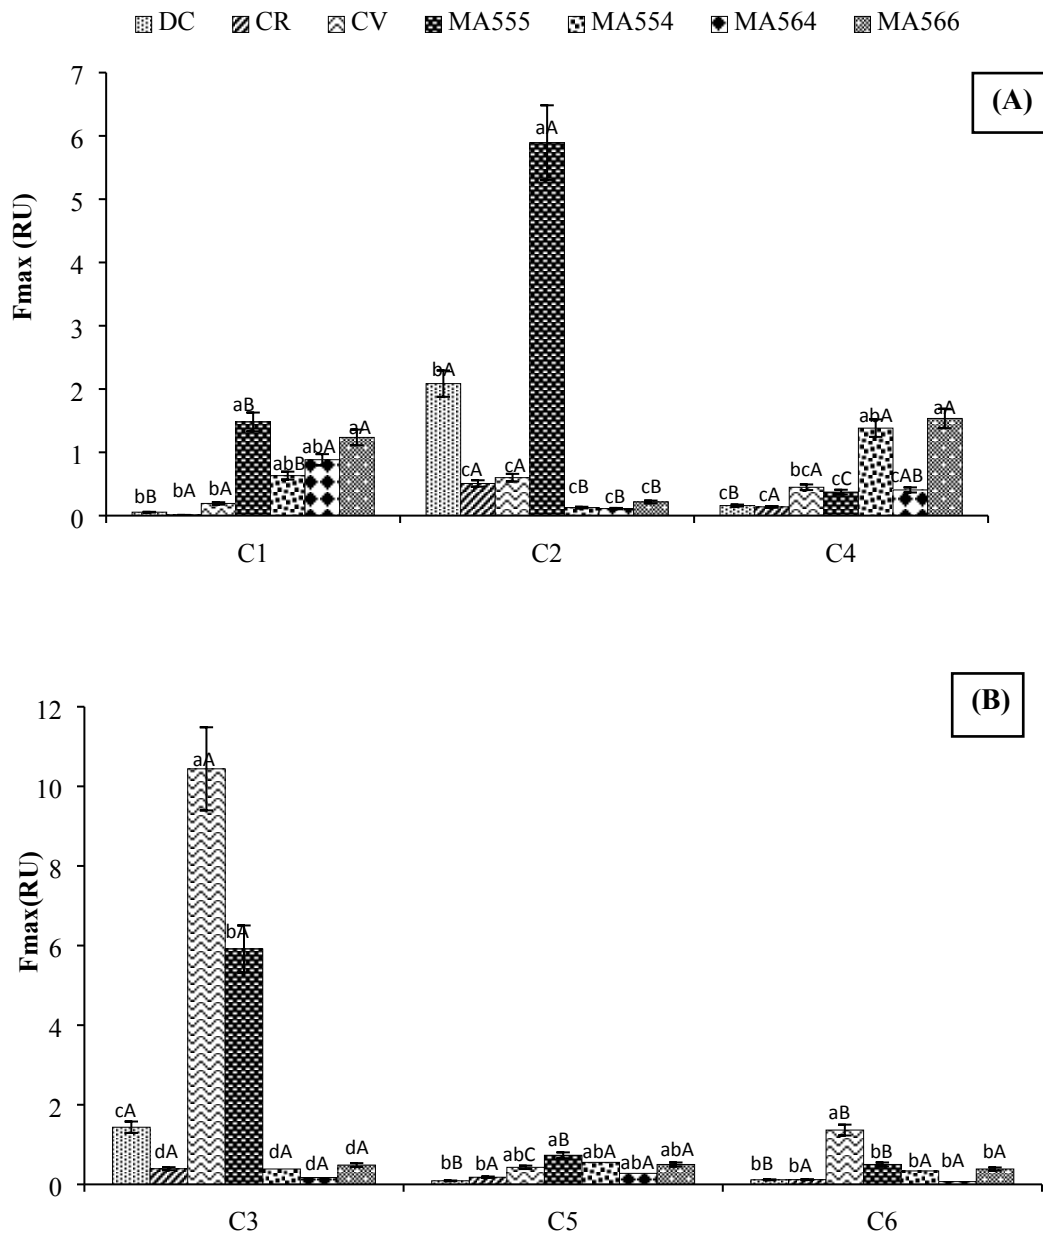

Figure S12 (A & B): Interaction averages of observed fluorophores during exponential phase

For statistical comparison of means, same upper-case letters indicate no significant effect of changes in AOM fluorophores for a same species, and same lower-case letters indicate no significant difference among species for a particular AOM component

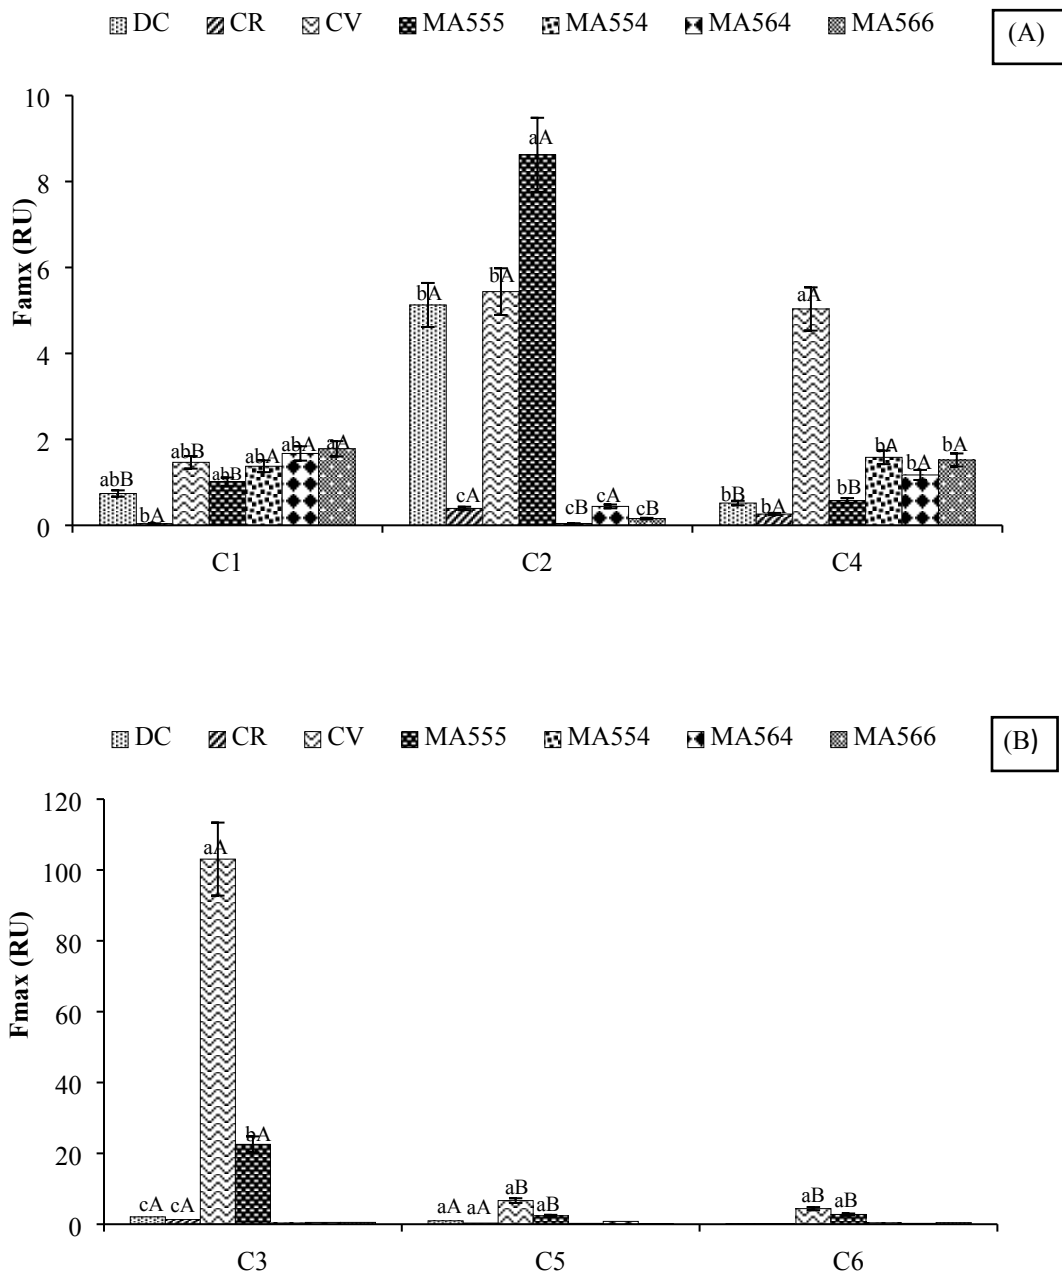

Figure S13 (A & B): Interaction averages of observed AOM components during stationary phase

For statistical comparison of means, same upper-case letters indicate no significant effect of changes in AOM fluorophores for a same species, and same lower-case letters indicate no significant difference among species for a particular AOM component

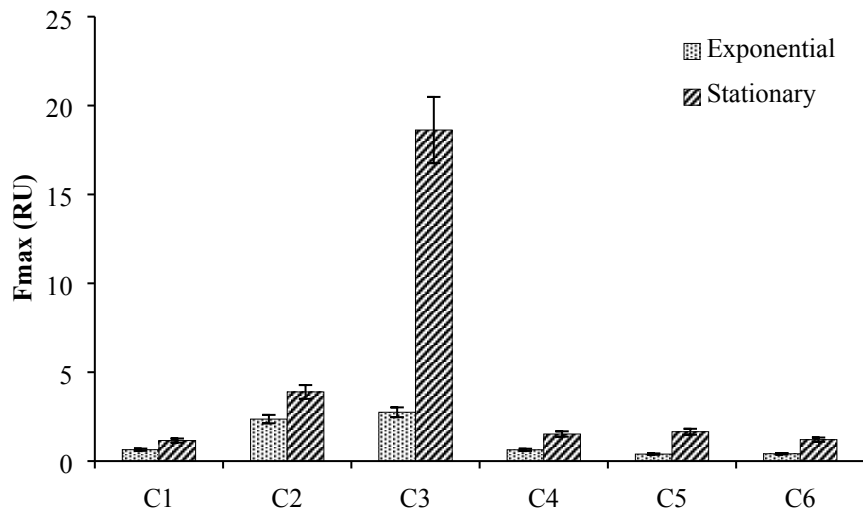

Figure S14: Single factor averages of observed AOM components (C1-C6) across exponential and stationary phase
